# Supplementary material for: Outcomes of oncological intended thoracic surgery after lung transplantation
Source: PubMed Central journal article supplement — J Thorac Dis. 2024 Mar 19;16(3):1933–46. doi: 10.21037/jtd-23-1669 (PMC11009586; doi:10.21037/jtd-23-1669), 2024-03-19
Supplement: jtd-16-03-1933-dss.pdf [file jtd-16-03-1933-dss.pdf]

## Data Sharing Statement

|                     |                                                                                                                                                     |                                                                                                       |
|---------------------|-----------------------------------------------------------------------------------------------------------------------------------------------------|-------------------------------------------------------------------------------------------------------|
| <b>Article Info</b> | <a href="https://dx.doi.org/10.21037/jtd-23-1669">https://dx.doi.org/10.21037/jtd-23-1669</a>                                                       |                                                                                                       |
| <b>Item</b>         | <b>Question</b>                                                                                                                                     | <b>Authors' Response<br/>(place "-" if not applicable)</b>                                            |
| 1                   | Would you like to share data collected for your study to others?                                                                                    | Yes.                                                                                                  |
| 2                   | If not, would you like to share the reason for your decision?                                                                                       | -                                                                                                     |
| 3                   | What data in particular will be shared?                                                                                                             | Upon request: survival data, details on surgical procedures, data management plan.                    |
| 4                   | Any other documents will be shared? Such as study protocol, statistical analysis plan, informed consent form, clinical study report, analytic code. | -                                                                                                     |
| 5                   | When will data availability begin?                                                                                                                  | From the publication date.                                                                            |
| 6                   | When will data availability end?                                                                                                                    | Two years within the publication date, since the technique or survival data may be updated over time. |
| 7                   | To whom will you share the data?                                                                                                                    | Physicians.                                                                                           |
| 8                   | For what type of analysis or purpose?                                                                                                               | Depends upon request.                                                                                 |
| 9                   | How or where can the data/documents be obtained?                                                                                                    | Contact with corresponding author.                                                                    |
| 10                  | Any other restrictions?                                                                                                                             | -                                                                                                     |
