# Supplementary material for: Outcomes of oncological intended thoracic surgery after lung transplantation
Source: PubMed Central journal article supplement — J Thorac Dis. 2024 Mar 19;16(3):1933–46. doi: 10.21037/jtd-23-1669 (PMC11009586; doi:10.21037/jtd-23-1669), 2024-03-19
Supplement: jtd-16-03-1933-supplementary.pdf [file jtd-16-03-1933-supplementary.pdf]

**Table S1** Individual respiratory characteristics following LT

| Characteristics                                | LT patients  |                           |         |              |              |              |              |
|------------------------------------------------|--------------|---------------------------|---------|--------------|--------------|--------------|--------------|
|                                                | #1           | #2                        | #3      | #4           | #5           | #6           | #7           |
| Sex                                            | M            | M                         | M       | M            | M            | F            | M            |
| Age at TS, years                               | 63           | 64                        | 67      | 66           | 57           | 54           | 64           |
| Site of TS                                     | N            | N                         | N       | T            | T            | N            | T            |
| CLAD prior to TS                               | Yes          | Yes                       | No      | Yes          | Yes          | Yes          | No           |
| Treatment for BOS                              | Azithromycin | Azithromycin,<br>PCT, ECP | No      | Azithromycin | Azithromycin | PCT          | No           |
| Type of resection                              | PneumoX      | PneumoX                   | PneumoX | SegmentX     | SegmentX     | Non-anatomic | Non-anatomic |
| First PFT after TS                             |              |                           |         |              |              |              |              |
| Months after TS                                | 0.30         | 2.30                      | 0.50    | 0.80         | 0.60         | NA           | NA           |
| FVC, L                                         | 1.27         | 1.32                      | 2.69    | 2.33         | 1.86         |              |              |
| FEV <sub>1</sub> , L                           | 0.84         | 0.81                      | 1.52    | 1.64         | 0.96         |              |              |
| TLC, % predicted                               | 52.00        | 66.50                     | 68.80   | 66.00        | 88.60        |              |              |
| RV, % predicted                                | 92.20        | 126.20                    | 48.60   | 75.40        | 143.30       |              |              |
| DLCO/VA, % predicted                           | NA           | 53.60                     | 91.40   | 70.90        | 86.50        |              |              |
| Last PFT after TS                              |              |                           |         |              |              |              |              |
| Months after TS                                | 11.00        | NA                        | 7.30    | 61.90        | 73.10        |              |              |
| FVC, L                                         | 1.08         |                           | 2.63    | 2.94         | 1.60         |              |              |
| FEV <sub>1</sub> , L                           | 0.68         |                           | 1.82    | 2.20         | 0.58         |              |              |
| TLC, % predicted                               | 53.300       |                           | 64.70   | 58.10        | 67.60        |              |              |
| RV, % predicted                                | 82.60        |                           | 64.70   | 58.10        | 107.30       |              |              |
| DLCO/VA, % predicted                           | NA           |                           | 75.80   | 85.70        | 106.00       |              |              |
| Difference between last and first PFT after TS |              |                           |         |              |              |              |              |
| Delta FVC, L                                   | -0.19        | NA                        | -0.06   | +0.61        | -0.26        |              |              |
| Delta FEV <sub>1</sub> , L                     | -0.16        |                           | +0.30   | +0.56        | -0.38        |              |              |
| Delta TLC, % predicted                         | +1.30        |                           | -4.10   | -7.90        | -21.00       |              |              |
| Delta RV, % predicted                          | -9.60        |                           | +16.10  | -17.30       | -36.00       |              |              |
| Delta DLCO/VA, % predicted                     | NA           |                           | -15.60  | +14.80       | +19.50       |              |              |

The difference between last and first postoperative PFT is given in absolute or relative values. Patient #2 was in no condition to show up for another visit in the outpatient clinic; #6 and #7 deceased during the hospital stay of TS. LT, lung transplantation; M, male; F, female; N, native lung; T, transplant lung; TS, thoracic surgery; CLAD, chronic lung allograft dysfunction; BOS, bronchiolitis obliterans syndrome; PCT, pulse corticosteroid therapy; ECP, extracorporeal photopheresis; PneumoX, pneumonectomy; SegmentX, segmentectomy; PFT, pulmonary function test; NA, not available; FVC, forced vital capacity; FEV<sub>1</sub>, forced expiratory volume in 1 second; TLC, total lung capacity; RV, residual volume; DLCO/VA, diffusion capacity for carbon monoxide related to alveolar volume (diffusion coefficient).

**Table S2** Median change in respiratory characteristics following LT (n=7)

| Characteristic                              | Site of TS                  |                       |
|---------------------------------------------|-----------------------------|-----------------------|
|                                             | Native lung (n=4)           | Transplant lung (n=3) |
| Preoperative testing to TS time, days       | 25 (5; 75)                  |                       |
| TS – postoperative testing time, days       | 17 (7; 63)                  |                       |
| Perioperative testing time, days            | 33 (22; 95)                 |                       |
| PFT                                         |                             |                       |
| Δ FVC, % predicted                          | -22 (-22; -20) <sup>a</sup> | -26 (-29; -24)        |
| Δ FEV <sub>1</sub> , % predicted            | -14 (-21; -13)              | -2 (-34; -19)         |
| Δ TLC, % predicted                          | -13 (-14; -13) <sup>a</sup> | -2 (-31; -18)         |
| Δ RV, % predicted                           | -17 (-29; -1)               | -29 (-41; -18)        |
| Δ DLCO, % predicted                         | -10                         | -24 (-40; -9)         |
| ABG analysis                                |                             |                       |
| Δ PaCO <sub>2</sub> , mmHg                  | 7.2 (2.1; 8.4)              | 3.1 (2.5; 3.6)        |
| Δ PaO <sub>2</sub> /FiO <sub>2</sub> , mmHg | -34 (-91; -24) <sup>a</sup> | -77 (-92; 61)         |
| Δ SaO <sub>2</sub> , %                      | -0.4 (-1.5; 2.3)            | -1.6 (-1.9; -1.4)     |
| Exercise capacity                           |                             |                       |
| Δ 6MWD, m                                   | -180                        | -40                   |
| Δ Borg score                                | 4                           | 1                     |

Data are shown as numbers or median (minimum; maximum); Δ, delta designates median difference between postoperative and preoperative test results. <sup>a</sup>, Statistically significant differences between postoperative and preoperative characteristics (P<0.05). Testing comprised assessment through PFT, ABG analysis, and 6MWD test. LT, lung transplantation; TS, thoracic surgery; PFT, pulmonary function test; FVC, forced vital capacity; FEV<sub>1</sub>, forced expiratory volume in 1 second; TLC, total lung capacity; RV, residual volume; DLCO, diffusion capacity for carbon monoxide; ABG, arterial blood gas; PaCO<sub>2</sub>, arterial carbon dioxide tension; PaO<sub>2</sub>, arterial oxygen tension; FiO<sub>2</sub>, inspiratory oxygen fraction; SaO<sub>2</sub>, arterial oxygen saturation; 6MWD, 6-minute walking distance.

**Table S3** Comparison of survival of lung cancer patients with or without prior lung transplantation

| Tumor stage | Histopathology | With prior LT |                      |     | Without prior LT          |                      |     |                           |
|-------------|----------------|---------------|----------------------|-----|---------------------------|----------------------|-----|---------------------------|
|             |                | Patient #     | 1-year survival rate | (%) | Overall survival (months) | 1-year survival rate | (%) | Overall survival (months) |
| IA          | SCLC           | #1            | 1                    | 100 | 24.6                      | 0/1                  | 0   | 3.6                       |
| IA          | SCC            | #4            | 1                    | 100 | 64.3                      | 6/9                  | 67  | 15.8                      |
| IIB         | SCC            | #5            | 1                    | 100 | 76.7                      | 24/42                | 57  | 21.9                      |
| IIIB        | SCC            | #2            | 0                    | 0   | 5.2                       | 8/13                 | 62  | 26.5                      |
| IVA         | SCC            | #3            | 0                    | 0   | 10.5                      | 1/3                  | 33  | 5.3                       |
| IVA         | ADC            | #6            | 0                    | 0   | 0.4                       | 4/15                 | 27  | 11.9                      |
| Total       |                |               | 3/6                  | 50  | 17.6                      | 44/83                | 53  | 13.9                      |

Of 2,856 lung cancer patients, 83 lung cancer patients matched to tumor stage and histopathology of those lung cancer patients who had undergone prior LT. LT, lung transplantation; SCLC, small cell lung cancer; SCC, squamous cell carcinoma; ADC, adenocarcinoma.
